# Supplementary material for: Nrf2 Is a Key Regulator on Puerarin Preventing Cardiac Fibrosis and Upregulating Metabolic Enzymes UGT1A1 in Rats
Source: PubMed Central journal article supplement (PMC5997811; doi:10.3389/fphar.2018.00540), 2018-06-06
Supplement: Presentation_1.pdf [file Presentation_1.pdf]

Supplement

Supplement 1

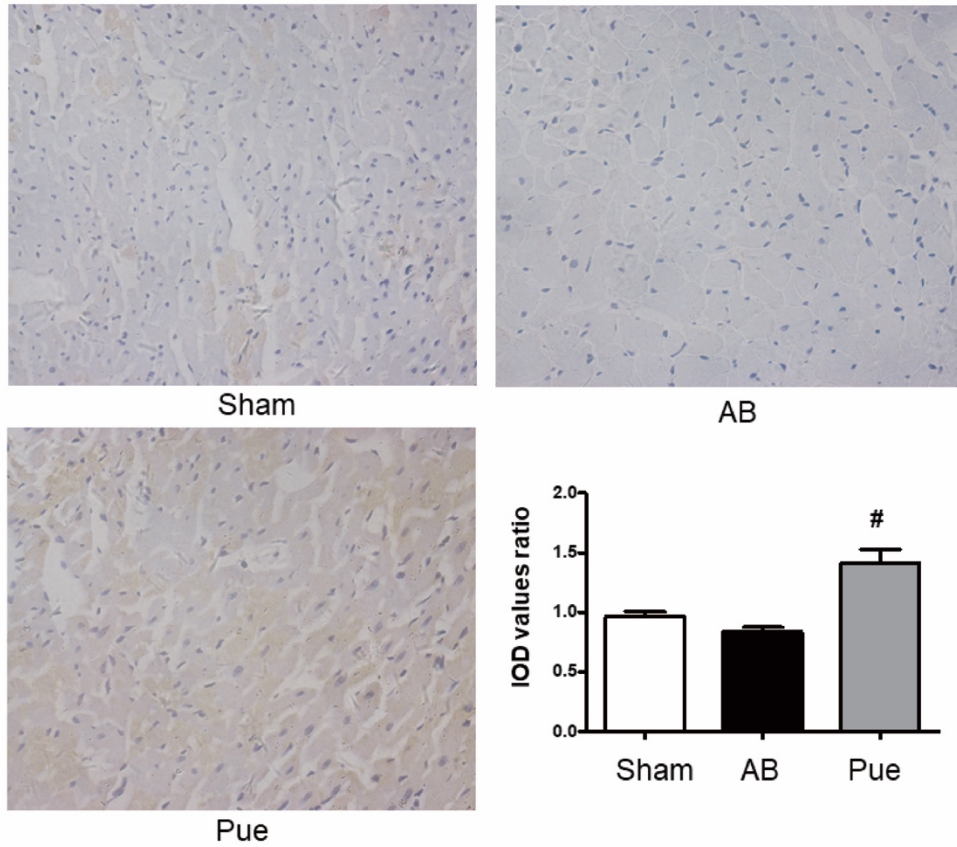

Fig S1 Immunohistochemical staining for Nrf2 in sections of animal tissue. <sup>#</sup> $P < 0.05$  vs. AB group.

Supplement 2

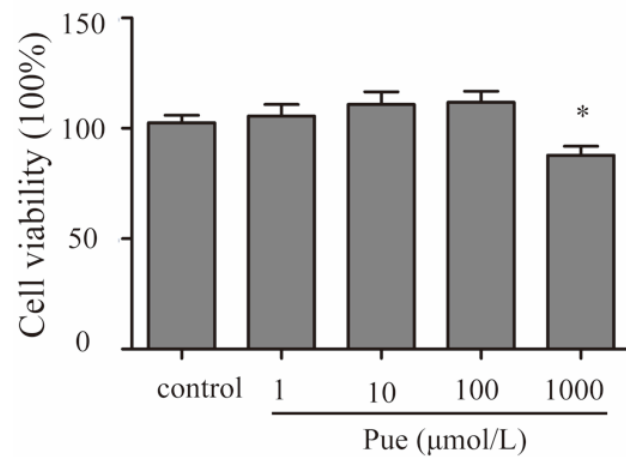

Fig. S2 The CCK-8 assay was used to detect proliferation of neonatal rat cardiac fibroblasts (NRCF), so as to evaluate the toxicity of puerarin. \* $P < 0.05$  vs. control, Pue 1  $\mu\text{mol/L}$ , Pue 10  $\mu\text{mol/L}$ , and Pue 100  $\mu\text{mol/L}$ .

### Supplement 3

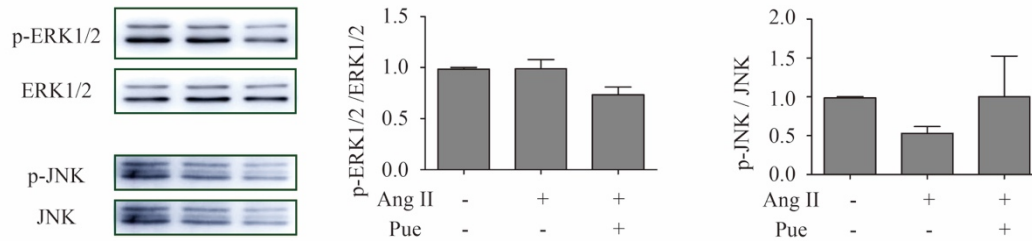

Fig. S3 Neither ERK1/2 nor JNK regulates the effects of puerarin in protecting against cardiac fibrosis in vitro. Ang II, 1  $\mu\text{M}$ ; puerarin, 100  $\mu\text{M}$ .  $n = 6$  for each group.

### Supplement 4

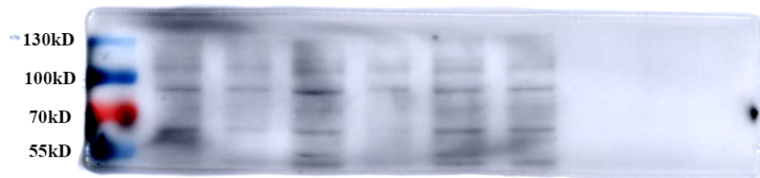

Fig. S4 The primitive strip of nuclear Nrf2 corresponding to Figure 6A.

### Supplement 5

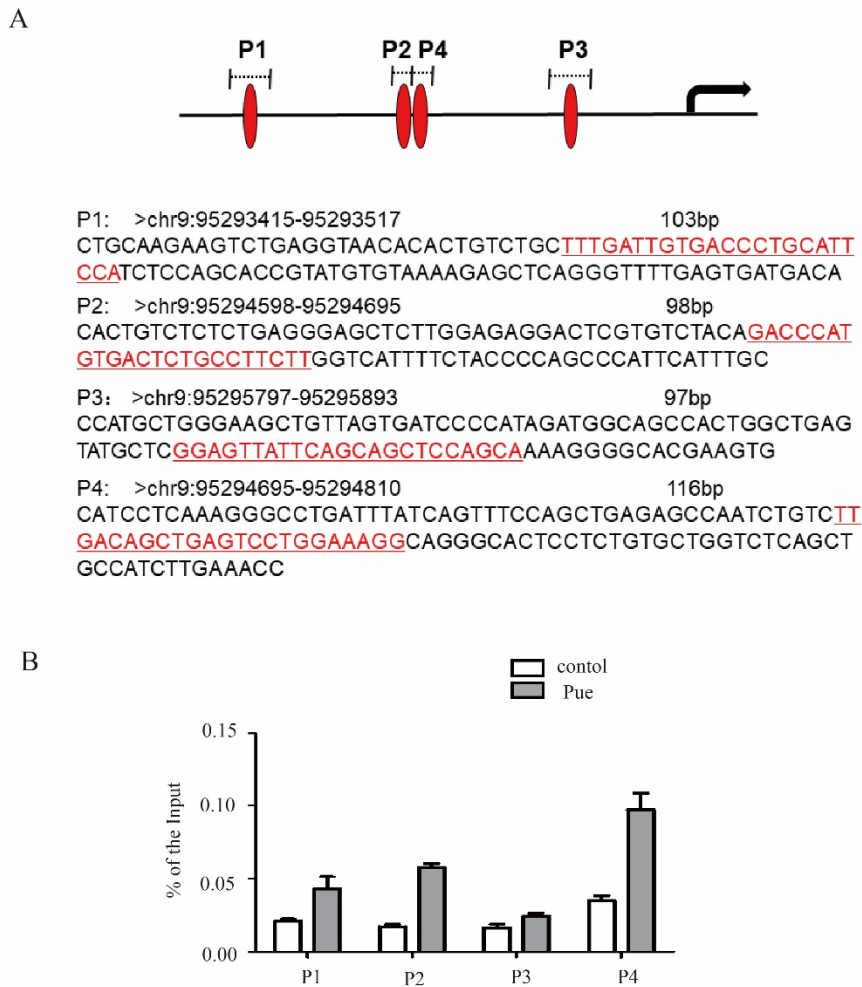

Fig. S5 The combination of transcription factor Nrf2 with the target gene promoter region P1 region, P2 region, P3 region, and P4 region in the control group and puerarin treatment group, respectively. A: Different binding sites in *Ugt1a1* promoter. B: In Vivo characterization of Nrf2 binding to the *Ugt1a1* promoter by ChIP assay.

**Table S1**

| Region | Primer of <i>Ugt1a1</i>                                                                              |
|--------|------------------------------------------------------------------------------------------------------|
| P1     | <i>Ugt1a1</i> -F: 5'-CTGCAAGAAGTCTGAGGTAACACAC-3'<br><i>Ugt1a1</i> -R: 5'-TGTCATCACTCAAACCCCTGAGC-3' |
| P2     | <i>Ugt1a1</i> -F: 5'-CACTGTCTCTCTGAGGGAGCTCTTG-3'<br><i>Ugt1a1</i> -R: 5'-GCAAATGAATGGGCTGGGGTAG-3'  |
| P3     | <i>Ugt1a1</i> -F: 5'-CCATGCTGGGAAGCTGTTAGTGATC-3'<br><i>Ugt1a1</i> -R: 5'-CACTTCGTGCCCCCTTTTGCTG-3'  |
| P4     | <i>Ugt1a1</i> -F: 5'-CATCCTCAAAGGGCCTGATTTAT-3'<br><i>Ugt1a1</i> -R: 5'-GGTTTCAAGATGGCAGCTGAG-3'     |

Table S1 the primer of *Ugt1a1* for different region
